# Supplementary material for: Microbiota-targeted interventions and clinical implications for maternal-offspring health: An umbrella review of systematic reviews and meta-analyses of randomised controlled trials
Source: PubMed Central journal article supplement (PMC11395958; doi:10.7189/jogh.14.04177), 2024-09-13
Supplement: jogh-14-04177-s001.pdf [file jogh-14-04177-s001.pdf]

**Supplementary Table 1. PRISMA 2020 Checklist**

| Section and Topic             | Item # | Checklist item                                                                                                                                                                                                                                                                                       | Location where item is reported |
|-------------------------------|--------|------------------------------------------------------------------------------------------------------------------------------------------------------------------------------------------------------------------------------------------------------------------------------------------------------|---------------------------------|
| <b>TITLE</b>                  |        |                                                                                                                                                                                                                                                                                                      |                                 |
| Title                         | 1      | Identify the report as a systematic review.                                                                                                                                                                                                                                                          | 1                               |
| <b>ABSTRACT</b>               |        |                                                                                                                                                                                                                                                                                                      |                                 |
| Abstract                      | 2      | See the PRISMA 2020 for Abstracts checklist.                                                                                                                                                                                                                                                         | 2                               |
| <b>INTRODUCTION</b>           |        |                                                                                                                                                                                                                                                                                                      |                                 |
| Rationale                     | 3      | Describe the rationale for the review in the context of existing knowledge.                                                                                                                                                                                                                          | 4-5                             |
| Objectives                    | 4      | Provide an explicit statement of the objective(s) or question(s) the review addresses.                                                                                                                                                                                                               | 5                               |
| <b>METHODS</b>                |        |                                                                                                                                                                                                                                                                                                      |                                 |
| Eligibility criteria          | 5      | Specify the inclusion and exclusion criteria for the review and how studies were grouped for the syntheses.                                                                                                                                                                                          | 6-7                             |
| Information sources           | 6      | Specify all databases, registers, websites, organisations, reference lists and other sources searched or consulted to identify studies. Specify the date when each source was last searched or consulted.                                                                                            | 6                               |
| Search strategy               | 7      | Present the full search strategies for all databases, registers and websites, including any filters and limits used.                                                                                                                                                                                 | 6                               |
| Selection process             | 8      | Specify the methods used to decide whether a study met the inclusion criteria of the review, including how many reviewers screened each record and each report retrieved, whether they worked independently, and if applicable, details of automation tools used in the process.                     | 6                               |
| Data collection process       | 9      | Specify the methods used to collect data from reports, including how many reviewers collected data from each report, whether they worked independently, any processes for obtaining or confirming data from study investigators, and if applicable, details of automation tools used in the process. | 7                               |
| Data items                    | 10a    | List and define all outcomes for which data were sought. Specify whether all results that were compatible with each outcome domain in each study were sought (e.g. for all measures, time points, analyses), and if not, the methods used to decide which results to collect.                        | 7                               |
|                               | 10b    | List and define all other variables for which data were sought (e.g. participant and intervention characteristics, funding sources). Describe any assumptions made about any missing or unclear information.                                                                                         | --                              |
| Study risk of bias assessment | 11     | Specify the methods used to assess risk of bias in the included studies, including details of the tool(s) used, how many reviewers assessed each study and whether they worked independently, and if applicable, details of automation tools used in the process.                                    | 8                               |
| Effect measures               | 12     | Specify for each outcome the effect measure(s) (e.g. risk ratio, mean difference) used in the synthesis or presentation of results.                                                                                                                                                                  | 9                               |
| Synthesis methods             | 13a    | Describe the processes used to decide which studies were eligible for each synthesis (e.g. tabulating the study intervention characteristics and comparing against the planned groups for each synthesis (item #5)).                                                                                 | --                              |
|                               | 13b    | Describe any methods required to prepare the data for presentation or synthesis, such as handling of missing summary statistics, or data conversions.                                                                                                                                                | --                              |
|                               | 13c    | Describe any methods used to tabulate or visually display results of individual studies and syntheses.                                                                                                                                                                                               | 9                               |

| Section and Topic             | Item # | Checklist item                                                                                                                                                                                                                                                                       | Location where item is reported |
|-------------------------------|--------|--------------------------------------------------------------------------------------------------------------------------------------------------------------------------------------------------------------------------------------------------------------------------------------|---------------------------------|
|                               | 13d    | Describe any methods used to synthesize results and provide a rationale for the choice(s). If meta-analysis was performed, describe the model(s), method(s) to identify the presence and extent of statistical heterogeneity, and software package(s) used.                          | 9                               |
|                               | 13e    | Describe any methods used to explore possible causes of heterogeneity among study results (e.g. subgroup analysis, meta-regression).                                                                                                                                                 | NA                              |
|                               | 13f    | Describe any sensitivity analyses conducted to assess robustness of the synthesized results.                                                                                                                                                                                         | NA                              |
| Reporting bias assessment     | 14     | Describe any methods used to assess risk of bias due to missing results in a synthesis (arising from reporting biases).                                                                                                                                                              | NA                              |
| Certainty assessment          | 15     | Describe any methods used to assess certainty (or confidence) in the body of evidence for an outcome.                                                                                                                                                                                | 8                               |
| <b>RESULTS</b>                |        |                                                                                                                                                                                                                                                                                      |                                 |
| Study selection               | 16a    | Describe the results of the search and selection process, from the number of records identified in the search to the number of studies included in the review, ideally using a flow diagram.                                                                                         | 10                              |
|                               | 16b    | Cite studies that might appear to meet the inclusion criteria, but which were excluded, and explain why they were excluded.                                                                                                                                                          | --                              |
| Study characteristics         | 17     | Cite each included study and present its characteristics.                                                                                                                                                                                                                            | 12-15                           |
| Risk of bias in studies       | 18     | Present assessments of risk of bias for each included study.                                                                                                                                                                                                                         | 10                              |
| Results of individual studies | 19     | For all outcomes, present, for each study: (a) summary statistics for each group (where appropriate) and (b) an effect estimate and its precision (e.g. confidence/credible interval), ideally using structured tables or plots.                                                     | 10-12                           |
| Results of syntheses          | 20a    | For each synthesis, briefly summarise the characteristics and risk of bias among contributing studies.                                                                                                                                                                               | 10                              |
|                               | 20b    | Present results of all statistical syntheses conducted. If meta-analysis was done, present for each the summary estimate and its precision (e.g. confidence/credible interval) and measures of statistical heterogeneity. If comparing groups, describe the direction of the effect. | NA                              |
|                               | 20c    | Present results of all investigations of possible causes of heterogeneity among study results.                                                                                                                                                                                       | NA                              |
|                               | 20d    | Present results of all sensitivity analyses conducted to assess the robustness of the synthesized results.                                                                                                                                                                           | NA                              |
| Reporting biases              | 21     | Present assessments of risk of bias due to missing results (arising from reporting biases) for each synthesis assessed.                                                                                                                                                              | NA                              |
| Certainty of evidence         | 22     | Present assessments of certainty (or confidence) in the body of evidence for each outcome assessed.                                                                                                                                                                                  | 10                              |
| <b>DISCUSSION</b>             |        |                                                                                                                                                                                                                                                                                      |                                 |
| Discussion                    | 23a    | Provide a general interpretation of the results in the context of other evidence.                                                                                                                                                                                                    | 16-18                           |
|                               | 23b    | Discuss any limitations of the evidence included in the review.                                                                                                                                                                                                                      | 18-19                           |
|                               | 23c    | Discuss any limitations of the review processes used.                                                                                                                                                                                                                                | 19                              |
|                               | 23d    | Discuss implications of the results for practice, policy, and future research.                                                                                                                                                                                                       | 19                              |

| Section and Topic                              | Item # | Checklist item                                                                                                                                                                                                                             | Location where item is reported |
|------------------------------------------------|--------|--------------------------------------------------------------------------------------------------------------------------------------------------------------------------------------------------------------------------------------------|---------------------------------|
| <b>OTHER INFORMATION</b>                       |        |                                                                                                                                                                                                                                            |                                 |
| Registration and protocol                      | 24a    | Provide registration information for the review, including register name and registration number, or state that the review was not registered.                                                                                             | 2&6                             |
|                                                | 24b    | Indicate where the review protocol can be accessed, or state that a protocol was not prepared.                                                                                                                                             | 6                               |
|                                                | 24c    | Describe and explain any amendments to information provided at registration or in the protocol.                                                                                                                                            | NA                              |
| Support                                        | 25     | Describe sources of financial or non-financial support for the review, and the role of the funders or sponsors in the review.                                                                                                              | 20                              |
| Competing interests                            | 26     | Declare any competing interests of review authors.                                                                                                                                                                                         | 20                              |
| Availability of data, code and other materials | 27     | Report which of the following are publicly available and where they can be found: template data collection forms; data extracted from included studies; data used for all analyses; analytic code; any other materials used in the review. | 20                              |

NA: not applicable.

From: Page MJ, McKenzie JE, Bossuyt PM, Boutron I, Hoffmann TC, Mulrow CD, et al. The PRISMA 2020 statement: an updated guideline for reporting systematic reviews. *BMJ* 2021;372:n71. doi: 10.1136/bmj.n71

## Supplementary materials

**Supplementary Table 2:** Searching terms and outputs for six databases.

| Database         | Terms                                                                                                                                                                                                                                                                                                                                                                                                                                                                                                                                                                                                                                                                                                                                      | Result |
|------------------|--------------------------------------------------------------------------------------------------------------------------------------------------------------------------------------------------------------------------------------------------------------------------------------------------------------------------------------------------------------------------------------------------------------------------------------------------------------------------------------------------------------------------------------------------------------------------------------------------------------------------------------------------------------------------------------------------------------------------------------------|--------|
| PubMed           | ((Probiotic* OR Prebiotic* OR Synbiotic* OR ("Probiotic* OR Prebiotic* OR Symbiotic*" [MeSH] OR ("Probiotic* OR Prebiotic* OR Synbiotic*" [All Fields]))) AND (Pregnancy OR Lactation OR Antepartum OR Prenatal OR Perinatal OR Postpartum OR ("Pregnancy"[MeSH] OR ("Pregnancy" [All Fields]))) AND (Preeclampsia OR Hypertension disorders OR Gestational diabetes mellitus OR Premature rupture of membrane OR Mastitis OR Breast engorgement OR Mental disorder OR Psychosis OR Depression OR Anxiety OR Safety OR Pregnancy outcome OR Neonatal outcome OR Infection OR Preterm-labor OR Abortion OR Miscarriage OR ("Complication* OR Outcome*" [All Fields])) AND (Systematic review and meta-analysis OR Review OR meta-analysis)) | 456    |
| Web of Science   | ((Probiotic* OR Prebiotic* OR Synbiotic*) AND (Pregnancy OR Lactation OR Antepartum OR Prenatal OR Perinatal OR Postpartum) AND (Preeclampsia OR Hypertension disorders OR Gestational diabetes mellitus OR Premature rupture of membrane OR Mastitis OR Breast engorgement OR Mental disorder OR Psychosis OR Depression OR Anxiety OR Safety OR Pregnancy outcome OR Neonatal outcome OR Infection OR Preterm-labor OR Abortion OR Miscarriage) AND (Systematic review and meta-analysis OR Review OR meta-analysis))                                                                                                                                                                                                                    | 380    |
| Cochrane Library | ((Probiotics) OR (Prebiotics)OR (synbiotics) OR (symbiotics)) AND ((Systematic review and meta-analysis) OR ("meta-analysis") OR (review)) AND ((Pregnancy) OR (lactation) OR (pregnancy outcome) OR (infant outcome))) in Title Abstract Keyword - (Word variations have been searched)                                                                                                                                                                                                                                                                                                                                                                                                                                                   | 24     |
| EMBASE           | ((Probiotics) OR (Prebiotics)OR (synbiotics) OR (symbiotics)) AND ((Systematic review and meta-analysis) OR ("meta-analysis") OR (review)) AND ((Pregnancy) OR (lactation) OR (pregnancy outcome) OR (infant outcome)))                                                                                                                                                                                                                                                                                                                                                                                                                                                                                                                    | 554    |
| Science Direct   | ((Probiotics OR Prebiotics OR Synbiotics) AND (Pregnancy OR Lactation) AND (Systematic review and meta-analysis OR Review OR meta-analysis))                                                                                                                                                                                                                                                                                                                                                                                                                                                                                                                                                                                               | 928    |
| Scopus           | ((probiotic* OR prebiotic* OR synbiotic*) AND (pregnancy OR lactation) AND (systematic AND review AND meta-analysis OR review OR meta-analysis))                                                                                                                                                                                                                                                                                                                                                                                                                                                                                                                                                                                           | 240    |
| Total            |                                                                                                                                                                                                                                                                                                                                                                                                                                                                                                                                                                                                                                                                                                                                            | 2582   |

**Supplementary Table 3:** Certainty of evidence included in the umbrella review using the GRADE system.

| Review                | Risk of bias | Inconsistency  | Indirectness | Imprecision  | Publication bias | Certainty |
|-----------------------|--------------|----------------|--------------|--------------|------------------|-----------|
| Othman, et al. 2007   | Serious      | Not applicable | No serious   | No serious   | Not reported     | ●●●○      |
| Dugoua, et al. 2009   | Not reported | No serious     | No serious   | No serious   | Unlikely         | ●●●○      |
| Han, et al. 2019      | No serious   | No serious     | No serious   | No serious   | Unlikely         | ●●●●      |
| Masulli et al. 2020   | No serious   | No serious     | No serious   | No serious   | Likely           | ●●●○      |
| Kuang, L., Y. 2020    | No serious   | No serious     | No serious   | No serious   | Unlikely         | ●●●●      |
| Moore, et al. 2020    | No serious   | Not applicable | No serious   | No serious   | Not applicable   | ●●●●      |
| Desai, et al. 2021    | No serious   | No serious     | No serious   | No serious   | Not done         | ●●●○      |
| Pérez et al. 202      | Serious      | No serious     | No serious   | No serious   | Unlikely         | ●●●○      |
| Chen, et al. 2022     | No serious   | Serious        | No serious   | No serious   | Likely           | ●○○○      |
| Menichini, D. 2022    | Serious      | No serious     | No serious   | No serious   | Unlikely         | ●●●○      |
| Colquitt, et al. 2022 | No serious   | Not reported   | No serious   | Not reported | Likely           | ●○○○      |
| Yu, et al. 2022       | No serious   | No serious     | No serious   | No serious   | Not done         | ●●●○      |
| Mahdizade et al. 2022 | No serious   | No serious     | No serious   | No serious   | Likely           | ●●●○      |
| Movaghar, R 2022      | No serious   | Serious        | No serious   | No serious   | Not reported     | ●●●○      |
| Martin, et al. 2022   | No serious   | Not applicable | No serious   | No serious   | Not applicable   | ●●●●      |
| Halemani, et al. 2023 | No serious   | Serious        | No serious   | No serious   | Not reported     | ●●●○      |
| Bekalu et al 2023     | No serious   | Serious        | No serious   | No serious   | Unlikely         | ●●●○      |

SRMA: Systematic Review and Meta-analysis; SR: Systematic Review; GDM: Gestational diabetes Mellitus; SBP: Systolic blood pressure; DBP: Diastolic blood pressure; MA: Meta-analysis; RoB: Risk of bias; NR: Not reported; ●●●● high; ●●●○ Moderate; ●○○○ Low.





**Supplementary Table 5:** Graphical crosstabulation to display the overlapping and selection of studies included in Group B Streptococcus theme.

|                     | Jois, R. S. 2020 | Menichini, D. 2022 |
|---------------------|------------------|--------------------|
| Hanson et al 2014   |                  |                    |
| Ho et al 2016       |                  |                    |
| Ming-Ho, 2016       |                  |                    |
| Olsen et al 2018    |                  |                    |
| Azizet al 2018      |                  |                    |
| Sharpe et al., 2019 |                  |                    |
| Farr, 2020          |                  |                    |



**Supplementary Table 6:** Graphical crosstabulation to display the overlapping and selection of studies included in the preeclampsia theme.

|                      | Movaghar,<br>R 2022 |
|----------------------|---------------------|
| Kopp 2008            |                     |
| Yuniati, 2013        |                     |
| García-Ródenas, 2016 |                     |
| Cabana 2017          |                     |
| Hajifaraji 2 2018    |                     |

**Supplementary Table 7:** Graphical crosstabulation to display the overlapping and selection of studies included in the infant allergies theme.

|                          | (Colquitt, et al. 2022) | (Yin, He et al. 2019) | (Kuang 2020) | (Doege, et al. 2012) | (Voigt 2022) | (Amalia, et al. 2020) |
|--------------------------|-------------------------|-----------------------|--------------|----------------------|--------------|-----------------------|
| Kalliomäki et al 2001    |                         |                       |              |                      |              |                       |
| Rautava et al. 2002      |                         |                       |              |                      |              |                       |
| Kalliomäki et al. 2003   |                         |                       |              |                      |              |                       |
| Kukkonen et al. 2006     |                         |                       |              |                      |              |                       |
| Abrahamsson et al. 2007  |                         |                       |              |                      |              |                       |
| Kukkonen et al 2007      |                         |                       |              |                      |              |                       |
| Kalliomäki et al. 2007   |                         |                       |              |                      |              |                       |
| Huurre et al. 2008       |                         |                       |              |                      |              |                       |
| Bottcher 2008            |                         |                       |              |                      |              |                       |
| Kopp 2008                |                         |                       |              |                      |              |                       |
| Prescott 2008            |                         |                       |              |                      |              |                       |
| Wickens 2008             |                         |                       |              |                      |              |                       |
| Samanta et al 2008       |                         |                       |              |                      |              |                       |
| Hurreetal. 2008          |                         |                       |              |                      |              |                       |
| Niers 2009               |                         |                       |              |                      |              |                       |
| Soh 2009                 |                         |                       |              |                      |              |                       |
| Kuitunen 2009            |                         |                       |              |                      |              |                       |
| West 2009                |                         |                       |              |                      |              |                       |
| Kim 2009                 |                         |                       |              |                      |              |                       |
| Boyle et al. 2010        |                         |                       |              |                      |              |                       |
| Dotterud et al. 2010     |                         |                       |              |                      |              |                       |
| Kim 2010                 |                         |                       |              |                      |              |                       |
| Wu Fuling, 2010          |                         |                       |              |                      |              |                       |
| Allen et al.2010         |                         |                       |              |                      |              |                       |
| Luoto et al. 2010        |                         |                       |              |                      |              |                       |
| Boyle 2011               |                         |                       |              |                      |              |                       |
| Ou 2012                  |                         |                       |              |                      |              |                       |
| Rautava 2012             |                         |                       |              |                      |              |                       |
| Wickens 2012             |                         |                       |              |                      |              |                       |
| Jensen 2012              |                         |                       |              |                      |              |                       |
| Abrahamsson 2013         |                         |                       |              |                      |              |                       |
| Wickens 2013             |                         |                       |              |                      |              |                       |
| West 2013                |                         |                       |              |                      |              |                       |
| Benor et al. 2013        |                         |                       |              |                      |              |                       |
| Allen 2014               |                         |                       |              |                      |              |                       |
| Lindsay et al 2014       |                         |                       |              |                      |              |                       |
| Nomoto,et al.2014        |                         |                       |              |                      |              |                       |
| Bertelsen,et al. 2014    |                         |                       |              |                      |              |                       |
| Simpson et al. 2015      |                         |                       |              |                      |              |                       |
| Mastromarino et al. 2015 |                         |                       |              |                      |              |                       |
| Cabana 2017              |                         |                       |              |                      |              |                       |
| Wickens et al. 2017      |                         |                       |              |                      |              |                       |
| Peldan et al. 2017       |                         |                       |              |                      |              |                       |
| amm,et al.2017           |                         |                       |              |                      |              |                       |
| Wickens et al. 2018      |                         |                       |              |                      |              |                       |
| Davies,et al.2018        |                         |                       |              |                      |              |                       |
| Rautava et al. 2021      |                         |                       |              |                      |              |                       |

**Supplementary Table 8:** Graphical crosstabulation to display the overlapping and selection of studies included in the lactation mastitis theme.

|                             | (Barker, et al. 2020) | (Yu, et al. 2022) |
|-----------------------------|-----------------------|-------------------|
| Jime'nez et al. 2008        |                       |                   |
| Arroyo et al. 2010          |                       |                   |
| MaldonadoLobo'n et al. 2015 |                       |                   |
| Ferna'ndez et al. 2016      |                       |                   |
| Hurtado et al. 2017         |                       |                   |
| Jime'nez et al. 2021        |                       |                   |

**Supplementary Table 9:** Graphical crosstabulation to display the overlapping and selection of studies included in the mental health theme.

|                           | (Desai, et al. 2021) | (Trifkovič, et al. 2022) | (Halemani, et al. 2023) |
|---------------------------|----------------------|--------------------------|-------------------------|
| Mi, 2015                  |                      |                          |                         |
| Mastromarino, 2015        |                      |                          |                         |
| Mirghafourvand et al 2016 |                      |                          |                         |
| Slykerman et al 2016      |                      |                          |                         |
| Slykerman, 2017           |                      |                          |                         |
| Korpela, 2018             |                      |                          |                         |
| Okesene-Gafa et al. 2019  |                      |                          |                         |
| Dawe et al. 2020          |                      |                          |                         |
| Hulkkonen, 2021           |                      |                          |                         |
| Browne, 2021              |                      |                          |                         |
| Hulkkonen, 2022           |                      |                          |                         |
| Yıldız Karaahme, 2022     |                      |                          |                         |

**Supplementary Table 10:** Graphical crosstabulation to display the overlapping and selection of studies included in the pregnancy outcome theme.

|                       | (Othman, et al. 2007) | (Dugoua, et al. 2008) | (Grev, et al. 2017) | (Jarde, et al. 2018) | (Pérez et al. 2021) | Bekalu et al 2023 |
|-----------------------|-----------------------|-----------------------|---------------------|----------------------|---------------------|-------------------|
| Neri 1993             |                       |                       |                     |                      |                     |                   |
| Kalliomaki 2001       |                       |                       |                     |                      |                     |                   |
| Rautava et al. 2002   |                       |                       |                     |                      |                     |                   |
| Nishijima 2005        |                       |                       |                     |                      |                     |                   |
| Gueimonde et al. 2006 |                       |                       |                     |                      |                     |                   |
| Kukkonen et al. 2006  |                       |                       |                     |                      |                     |                   |
| Abrahamsson 2007      |                       |                       |                     |                      |                     |                   |
| Kaplas et al. 2007    |                       |                       |                     |                      |                     |                   |
| Kukkonen et al. 2007  |                       |                       |                     |                      |                     |                   |
| Kopp 2008             |                       |                       |                     |                      |                     |                   |
| Bergmann, 2008        |                       |                       |                     |                      |                     |                   |
| Bababi et al 2008     |                       |                       |                     |                      |                     |                   |
| Wickens et al 2008    |                       |                       |                     |                      |                     |                   |
| Laitinen 2009         |                       |                       |                     |                      |                     |                   |
| Niers, 2009           |                       |                       |                     |                      |                     |                   |
| Kim, 2010             |                       |                       |                     |                      |                     |                   |
| Allen, 2010           |                       |                       |                     |                      |                     |                   |
| Dotterund 2010        |                       |                       |                     |                      |                     |                   |
| Luoto 2010            |                       |                       |                     |                      |                     |                   |
| Asemi 2011            |                       |                       |                     |                      |                     |                   |
| Boyle 2011            |                       |                       |                     |                      |                     |                   |
| Krauss-Silva 2011     |                       |                       |                     |                      |                     |                   |
| Ou 2012               |                       |                       |                     |                      |                     |                   |
| Rautava 2012          |                       |                       |                     |                      |                     |                   |
| Hantoushzadeh, 2012   |                       |                       |                     |                      |                     |                   |
| Taghizadeh et al 2013 |                       |                       |                     |                      |                     |                   |
| Lindsay 2014          |                       |                       |                     |                      |                     |                   |
| Benor 2014            |                       |                       |                     |                      |                     |                   |
| Lindsay 2015          |                       |                       |                     |                      |                     |                   |
| Dolatkah 2015         |                       |                       |                     |                      |                     |                   |
| Mastromarino 2015     |                       |                       |                     |                      |                     |                   |
| Okesene-Gafa 2016     |                       |                       |                     |                      |                     |                   |
| Fernández 2016        |                       |                       |                     |                      |                     |                   |
| Jacobsson 2016        |                       |                       |                     |                      |                     |                   |
| Mantaring 2016        |                       |                       |                     |                      |                     |                   |
| Karamali, 2016        |                       |                       |                     |                      |                     |                   |
| Jafarnejad 2016       |                       |                       |                     |                      |                     |                   |
| Ho 2016               |                       |                       |                     |                      |                     |                   |
| Ahmadi et al 2016     |                       |                       |                     |                      |                     |                   |
| Gille et al 2016      |                       |                       |                     |                      |                     |                   |

|                             |  |  |  |  |  |  |
|-----------------------------|--|--|--|--|--|--|
| Jamilian et al 2016         |  |  |  |  |  |  |
| Baldassarre 2016            |  |  |  |  |  |  |
| Dewanto et al 2017          |  |  |  |  |  |  |
| Wickens et al. 2017         |  |  |  |  |  |  |
| Vähämiko et al 2017         |  |  |  |  |  |  |
| Karamali 2018               |  |  |  |  |  |  |
| Badehnoosh 2018             |  |  |  |  |  |  |
| Mantaring et al 2018        |  |  |  |  |  |  |
| McMillan et al 2018         |  |  |  |  |  |  |
| Nabhani et al. 2018         |  |  |  |  |  |  |
| Okense-Gafa et al 2018      |  |  |  |  |  |  |
| Olsen et al. 2018           |  |  |  |  |  |  |
| Kijmanawa 2019              |  |  |  |  |  |  |
| Callaway 2019               |  |  |  |  |  |  |
| Asgharian et al.2019        |  |  |  |  |  |  |
| Chen et al 2019             |  |  |  |  |  |  |
| Jamilian et al 2019         |  |  |  |  |  |  |
| Pellonperä et. 2019         |  |  |  |  |  |  |
| Sahhaf et al 2019           |  |  |  |  |  |  |
| Sharpe et al. 2019          |  |  |  |  |  |  |
| Ali Pourmirzaiee et al 2020 |  |  |  |  |  |  |
| Halkjær et al. 2020         |  |  |  |  |  |  |
| Yang et al. 2020            |  |  |  |  |  |  |
| Pastor et al., 2020         |  |  |  |  |  |  |
| Karahmet 2022               |  |  |  |  |  |  |

**Supplementary Table 11:** Graphical crosstabulation to display a study included in the safety theme with no overlap.

|                          | (Dugoua, et al. 2009) |
|--------------------------|-----------------------|
| Kalliomäki et al. 2001   |                       |
| Rautava et al. 2002      |                       |
| Nishijima et al. 2005    |                       |
| Gueimonde et al.2006     |                       |
| Kukkonen et al. 2006     |                       |
| Abrahams son et al. 2007 |                       |
| Kaplas et al. 2007       |                       |
| Kukkonen et al. 2007     |                       |

**Supplementary Table 12:** Graphical crosstabulation to display the overlapping and selection of studies included in the bacterial transfer to infant theme.

|                          | (Moore, et al. 2020) | (Martin et al. 2022) | bekalu et al 2023 |
|--------------------------|----------------------|----------------------|-------------------|
| Lahtinen et al 2009      |                      |                      |                   |
| Abrahamsson et al, 2009  |                      |                      |                   |
| Grzeskowiak L et al 2012 |                      |                      |                   |
| Yuniati, 2013            |                      |                      |                   |
| Enomoto T 2014           |                      |                      |                   |
| Dotterud et al 2015      |                      |                      |                   |
| Rutten et al 2015        |                      |                      |                   |
| Mastromarino, 2015       |                      |                      |                   |
| Baglatzi, 2016           |                      |                      |                   |
| Cooper, 2016             |                      |                      |                   |
| García-Ródenas, 2016     |                      |                      |                   |
| Bazanella, 2017          |                      |                      |                   |
| Chien Chua, 2017         |                      |                      |                   |
| Frese, 2017              |                      |                      |                   |
| Korpela, 2018            |                      |                      |                   |
| Hurkala, 2020            |                      |                      |                   |
| Pastor-V et al, 2020     |                      |                      |                   |
| Estorninos, 2021         |                      |                      |                   |
| Phavichitr, 2021         |                      |                      |                   |
